# Supplementary material
Source: PubMed Central journal article supplement (PMC5179295)

## **SI Figure Legends**

Figure S1. fMRI component quality measures

Figure S2. MEG component quality measures

Figure S3. MEG within-frequency functional network connectivity (FNC) for delta, theta, alpha, and beta bands. ICA component numbers are on the diagonal.

Figure S1.

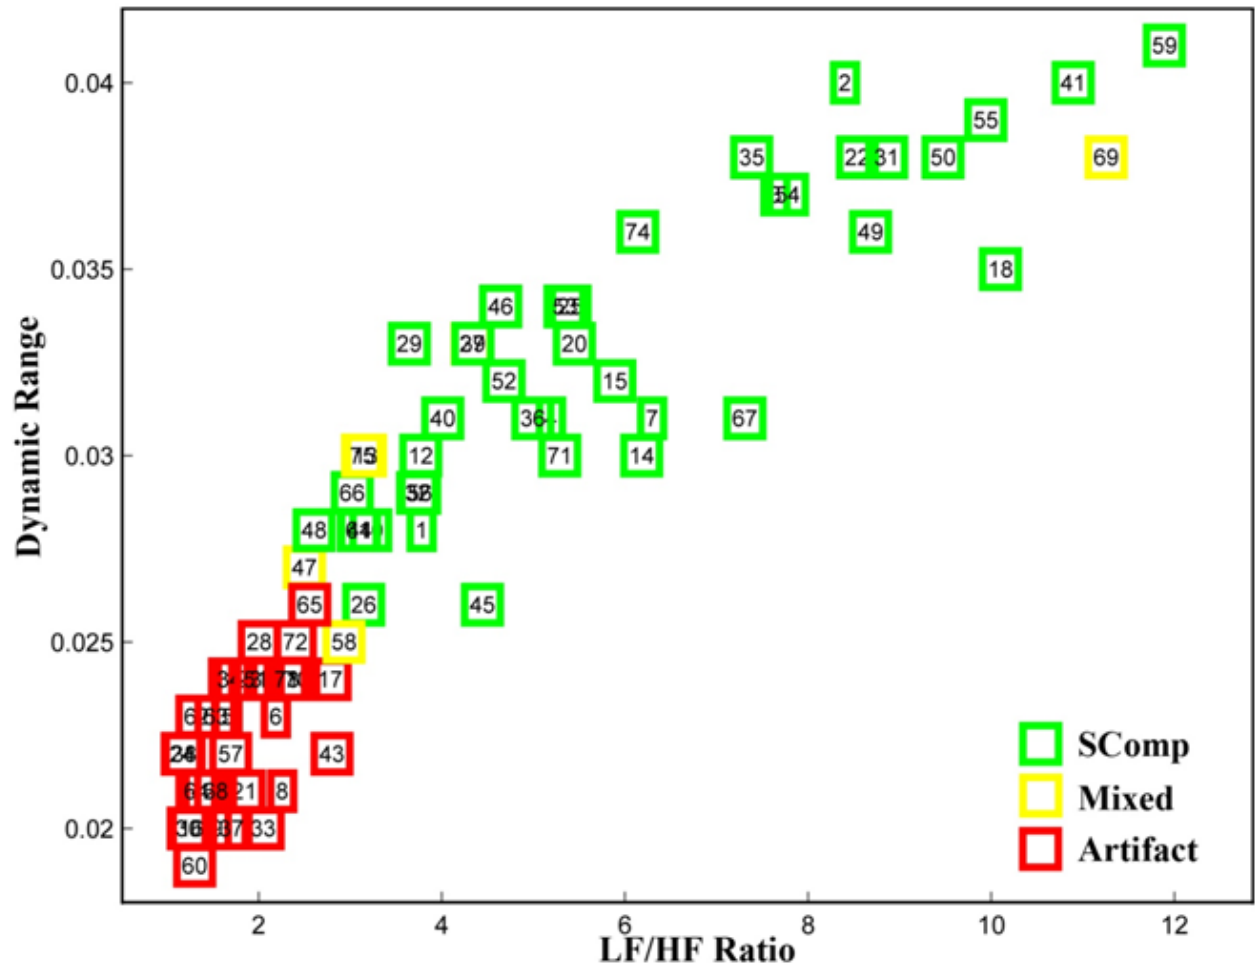

Figure S2.

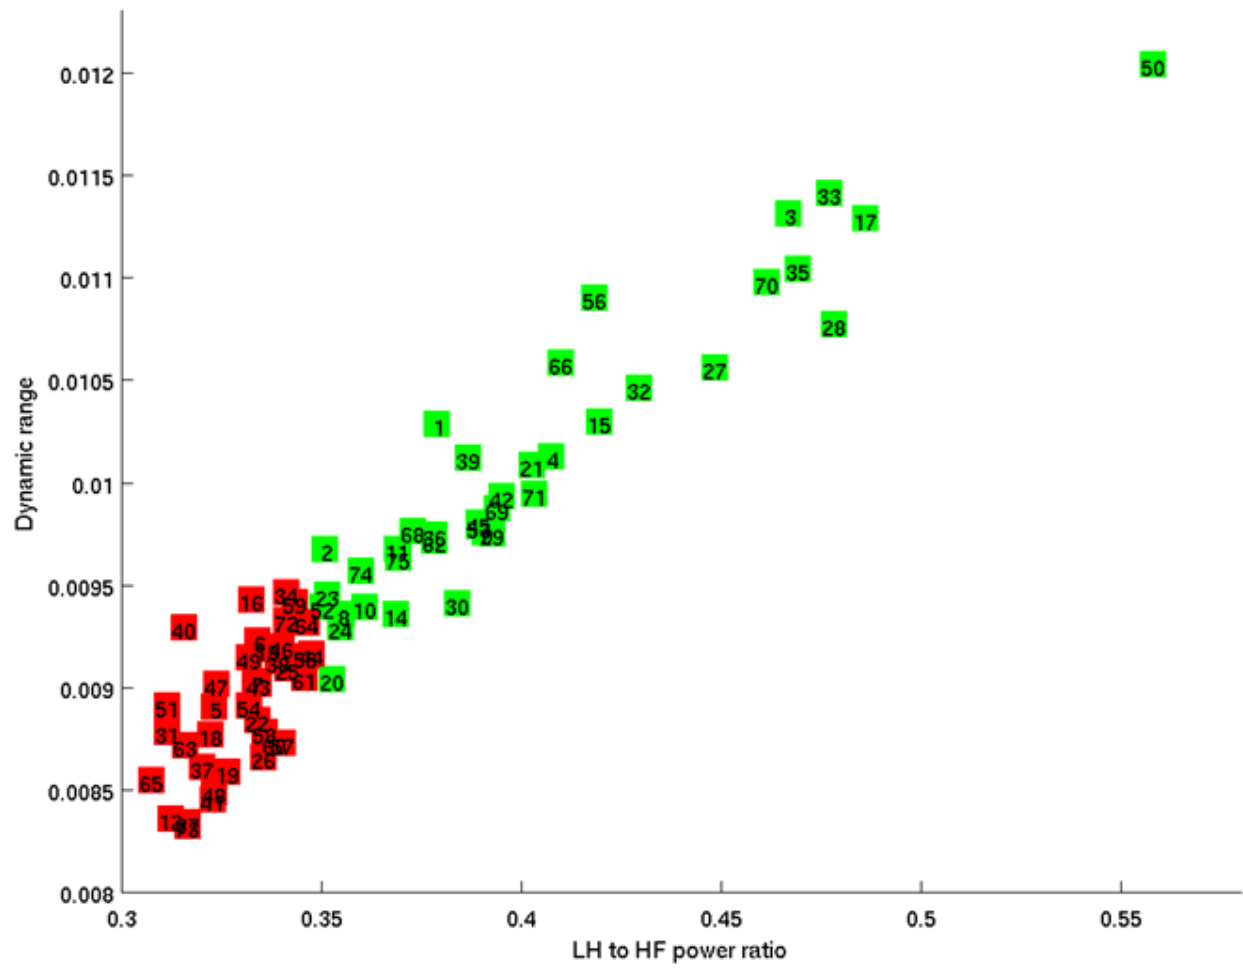

Figure S3.

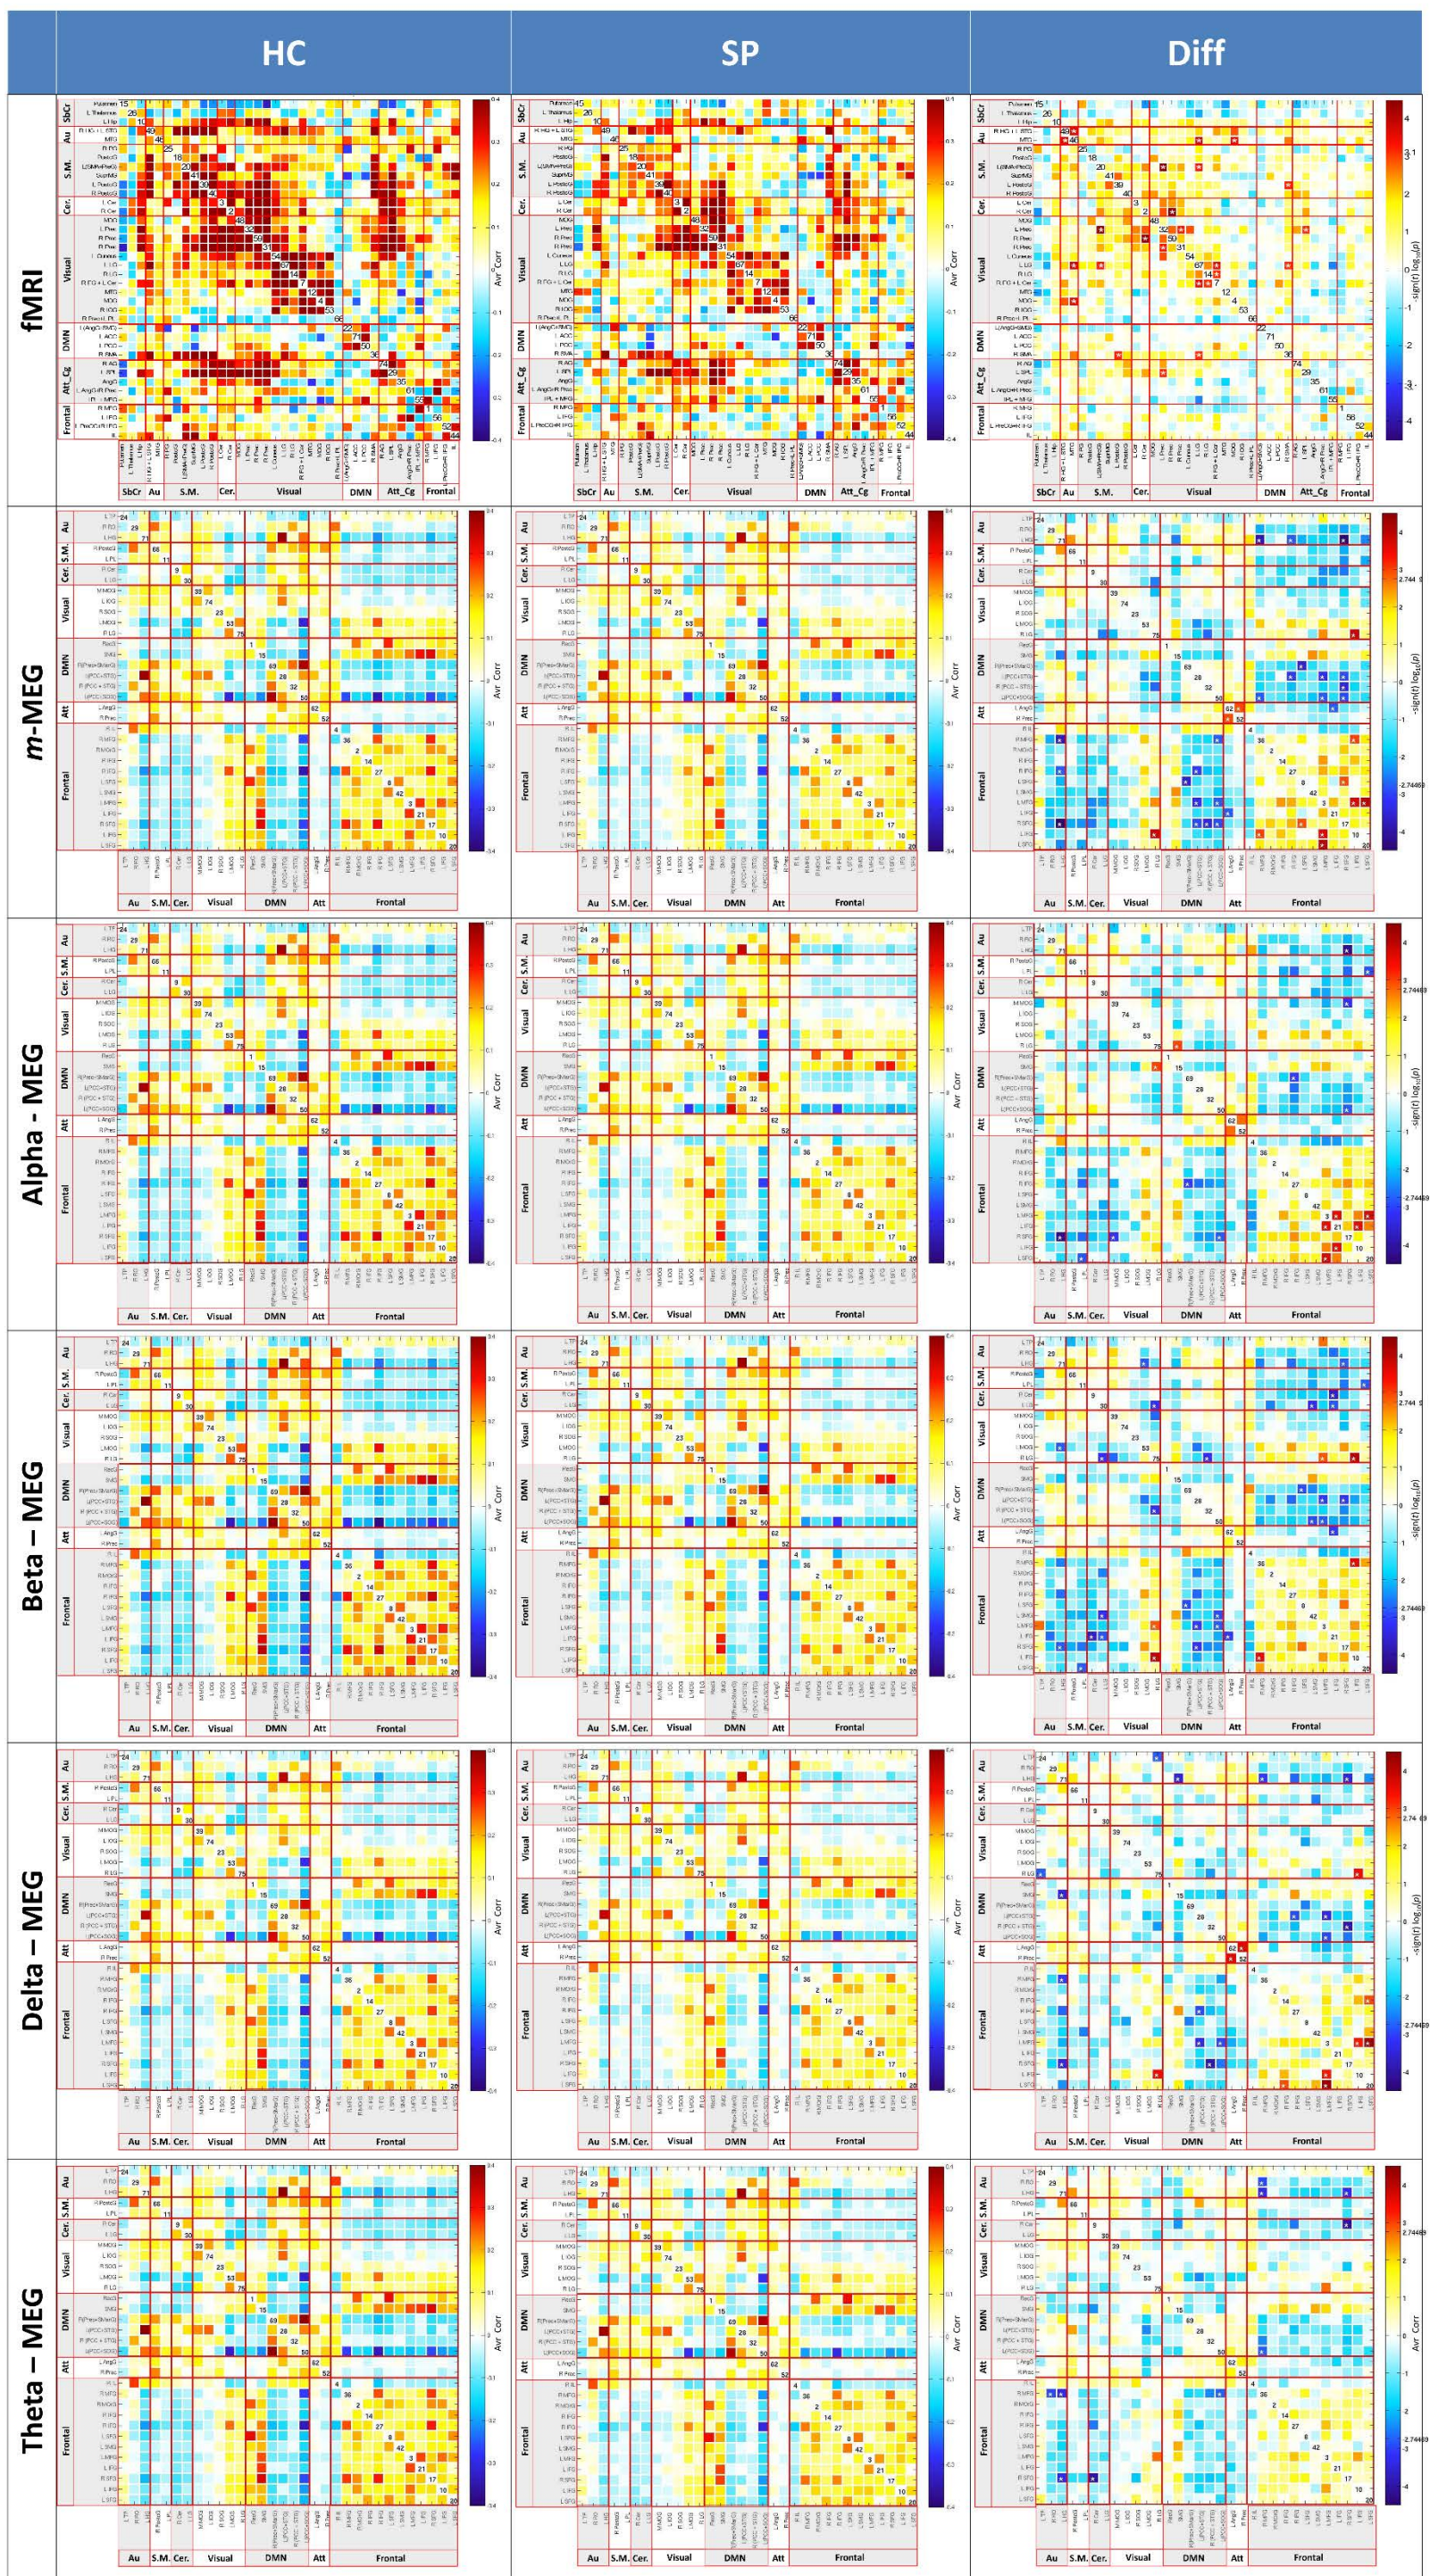

Supplement: NIHMS831989-supplement.pdf [file NIHMS831989-supplement.pdf]
